# Supplementary material for: Healthcare provider perspectives on integrating a comprehensive spine care model in an academic health system: a cross-sectional survey
Source: PubMed Central journal article supplement (PMC10804504; doi:10.1186/s12913-024-10578-z), 2024-01-23
Supplement: 12913_2024_10578_MOESM2_ESM.pdf [file 12913_2024_10578_MOESM2_ESM.pdf]

|   | <b>Question</b>                                            | <b>Question Type</b> | <b>Response Options (if applicable)</b>                                                                                                                                                                                    |
|---|------------------------------------------------------------|----------------------|----------------------------------------------------------------------------------------------------------------------------------------------------------------------------------------------------------------------------|
|   | <b>Demographics</b>                                        |                      |                                                                                                                                                                                                                            |
| 1 | Age                                                        | Open response        | N/A                                                                                                                                                                                                                        |
| 2 | Gender                                                     | Multiple choice      | Male<br>Female<br>Non-binary/third gender<br>Prefer to not answer                                                                                                                                                          |
| 3 | Primary place of work (ZIP code)                           | Open response        | N/A                                                                                                                                                                                                                        |
| 4 | Clinical Degree                                            | Multiple response    | Medical Doctor (MD)<br>Physician Assistant (PA)<br>Physical Therapist (PT)<br>Chiropractor                                                                                                                                 |
|   | If your degree is not included above, please list here     | Open response        | N/A                                                                                                                                                                                                                        |
| 5 | Clinical Department                                        | Multiple response    | Anesthesiology<br>Neurosurgery<br>Orthopaedics<br>Physical Medicine & Rehabilitation<br>Primary Care<br>Other<br>Urgent Care<br>Emergency Department<br>Neurology<br>Psychiatry<br>Integrative Medicine<br>Pain Management |
|   | If your department is not included above, please list here | Open response        | N/A                                                                                                                                                                                                                        |
| 6 | Clinical Setting                                           | Multiple response    | PDC Outpatient Clinic<br>Hospital Based Clinic<br>Inpatient Care                                                                                                                                                           |

|                     |                                                                                                                                                       |                     |                                                                         |
|---------------------|-------------------------------------------------------------------------------------------------------------------------------------------------------|---------------------|-------------------------------------------------------------------------|
| 7                   | Occupation                                                                                                                                            | Multiple response   | Administrator<br>Researcher<br>Clinician<br>Professor/Educator<br>Other |
| 8                   | Years in your profession                                                                                                                              | Multiple choice     | 0 to 3 years<br>4 to 10 years<br>More than 10 years                     |
| 9                   | Tenure at Duke                                                                                                                                        | Multiple choice     | 0 to 3 years<br>4 to 10 years<br>More than 10 years                     |
| 10                  | Did you complete a fellowship in spine surgery?                                                                                                       | Yes/No              | Yes<br>No                                                               |
| <b>Stepped Care</b> |                                                                                                                                                       |                     |                                                                         |
| 1                   | Patients in my clinical area would benefit from increased access to conservative approaches to spine care, such as physical therapy and chiropractic. | Likert Scale Matrix | Strongly Disagree<br>Disagree<br>Agree<br>Strongly Agree                |
| 2                   | Evidence-based spine care pathways are commonly followed in DUHS.                                                                                     |                     |                                                                         |
| 3                   | Clinical care pathways are too difficult to implement and/or sustain in DUHS.                                                                         |                     |                                                                         |
| 4                   | DUHS has methods in place to support coordinated multidisciplinary care for spine patients.                                                           |                     |                                                                         |
| 5                   | Primary care providers should recommend physical therapy before referring to specialty care.                                                          |                     |                                                                         |
| 6                   | Primary care providers should recommend non-pharmacological spine care, such as yoga,                                                                 |                     |                                                                         |

|                                 |                                                                                                                          |                     |                                                          |
|---------------------------------|--------------------------------------------------------------------------------------------------------------------------|---------------------|----------------------------------------------------------|
|                                 | massage, and chiropractic, before referring to specialty care.                                                           |                     |                                                          |
| 7                               | I know how to refer patients to self-care programs, such as yoga, exercise, and weight loss, within DUHS.                |                     |                                                          |
| <b>Resources</b>                |                                                                                                                          |                     |                                                          |
| 8                               | DUHS provides access to the full range of services needed by spine care patients in our community.                       | Likert Scale Matrix | Strongly Disagree<br>Disagree<br>Agree<br>Strongly Agree |
| 9                               | I wish I had more resources to support me in making referrals for spine care patients in my practice.                    |                     |                                                          |
| 10                              | I need more information about non-pharmacological care to integrate this into my practice.                               |                     |                                                          |
| 11                              | I need more information about community resources for patients with spine conditions.                                    |                     |                                                          |
| 12                              | I feel like the administrative insurance processes (i.e. benefits and authorization) are a barrier to my patient's care. |                     |                                                          |
| 13                              | Most patients expect to receive diagnostic imaging as part of their spine care treatment.                                |                     |                                                          |
| 14                              | Most patients expect to receive medication as part of their spine care treatment.                                        |                     |                                                          |
| 15                              | Most patients expect to receive physical therapy as part of their spine care treatment.                                  |                     |                                                          |
| 16                              | Most patients expect to receive chiropractic care as part of their spine care treatment.                                 |                     |                                                          |
| <b>Benchmarking Performance</b> |                                                                                                                          |                     |                                                          |

|                                  |                                                                                                                                                                                                                                                                                                                                                                                                                                                                                                                                                                                                                                               |                     |                                                          |
|----------------------------------|-----------------------------------------------------------------------------------------------------------------------------------------------------------------------------------------------------------------------------------------------------------------------------------------------------------------------------------------------------------------------------------------------------------------------------------------------------------------------------------------------------------------------------------------------------------------------------------------------------------------------------------------------|---------------------|----------------------------------------------------------|
| 17                               | DUHS places too much emphasis on specialty care, such as surgery and injections, for spine patients.                                                                                                                                                                                                                                                                                                                                                                                                                                                                                                                                          | Likert Scale Matrix | Strongly Disagree<br>Disagree<br>Agree<br>Strongly Agree |
| 18                               | I am comfortable with my imaging ordering information being shared among providers in my division.                                                                                                                                                                                                                                                                                                                                                                                                                                                                                                                                            |                     |                                                          |
| 19                               | I would reconsider some imaging requests if I knew my imaging order volume was substantially higher than my colleagues.                                                                                                                                                                                                                                                                                                                                                                                                                                                                                                                       |                     |                                                          |
| 20                               | I would reconsider some opioid prescribing if I knew my opioid prescribing volume was substantially higher than my colleagues.                                                                                                                                                                                                                                                                                                                                                                                                                                                                                                                |                     |                                                          |
| 21                               | I am likely to give my imaging order a second thought if I see a Best Practice Advisory.                                                                                                                                                                                                                                                                                                                                                                                                                                                                                                                                                      |                     |                                                          |
| <b>Guideline Concordant Care</b> |                                                                                                                                                                                                                                                                                                                                                                                                                                                                                                                                                                                                                                               |                     |                                                          |
| 22                               | <p>How frequently do you use this clinical practice guideline to guide clinical decision making:</p> <ul style="list-style-type: none"> <li>• North American Spine Society: Evidence-Based Clinical Guidelines for Multidisciplinary Spine Care: Diagnosis and Treatment of Low Back Pain (Kreiner D.S., Matz P; 2020)</li> <li>• American College of Physicians: Noninvasive Treatments for Acute, Subacute, and Chronic Low Back Pain: A Clinical Practice Guideline From the American College of Physicians (Qaseem A. et. al; 2017)</li> <li>• CDC: Guideline for Prescribing Opioids for Chronic Pain (Dowell D. et al; 2016)</li> </ul> | Likert Scale Matrix | Never<br>Infrequently<br>Often<br>Every Visit            |

|                             |                                                                                                                                                                                                                                                                                         |                   |                                                                                                                                                                                                                                                                                                                                                                                                                                                                         |
|-----------------------------|-----------------------------------------------------------------------------------------------------------------------------------------------------------------------------------------------------------------------------------------------------------------------------------------|-------------------|-------------------------------------------------------------------------------------------------------------------------------------------------------------------------------------------------------------------------------------------------------------------------------------------------------------------------------------------------------------------------------------------------------------------------------------------------------------------------|
|                             | <ul style="list-style-type: none"> <li>• Joint Commission: Advisory on Nonpharmacologic and Non-opioid Solutions for Pain Management (2018)</li> <li>• FDA: Education Blueprint for Health Care Providers Involved in the Management or Support of Patients with Pain (2017)</li> </ul> |                   |                                                                                                                                                                                                                                                                                                                                                                                                                                                                         |
|                             | Are there other guidelines you follow that are not listed here?                                                                                                                                                                                                                         | Open response     | N/A                                                                                                                                                                                                                                                                                                                                                                                                                                                                     |
| 23                          | Reason(s) why I do not use clinical practice guideline for spine care frequently                                                                                                                                                                                                        | Multiple response | <ul style="list-style-type: none"> <li>• Electronic Health Record (Maestro Care) does not facilitate the use of clinical practice guidelines.</li> <li>• I do not agree with the recommendations in current clinical practice guidelines.</li> <li>• I do not have access to clinical practice guidelines.</li> <li>• The guidelines do not align with the treatment preferences of my patients</li> <li>• Other</li> <li>• N/A: I use guidelines frequently</li> </ul> |
|                             | If you selected 'other' please provide the reason(s) why you do not use clinical practice guidelines.                                                                                                                                                                                   | Open response     | N/A                                                                                                                                                                                                                                                                                                                                                                                                                                                                     |
| 24                          | How would you feel about being nudged or educated when not following guidelines or when patient outcomes fall below guideline concordant care?                                                                                                                                          | Multiple Choice   | Really Appreciate<br>Somewhat Appreciate<br>Somewhat Not Appreciate<br>Really Not Appreciate                                                                                                                                                                                                                                                                                                                                                                            |
| <b>Spine Care Workforce</b> |                                                                                                                                                                                                                                                                                         |                   |                                                                                                                                                                                                                                                                                                                                                                                                                                                                         |
| 25                          | The following providers might be part of a multidisciplinary healthcare team for spine care.                                                                                                                                                                                            | Card sort grid    | Acupuncturist<br>Anesthesiologist<br>Chiropractor                                                                                                                                                                                                                                                                                                                                                                                                                       |

|    |                                                                                                                                                                                                                                                                                                                                                                                                                                                                                      |                |                                                                                                                                                                                                                                                                                                                                                                                                                                                 |
|----|--------------------------------------------------------------------------------------------------------------------------------------------------------------------------------------------------------------------------------------------------------------------------------------------------------------------------------------------------------------------------------------------------------------------------------------------------------------------------------------|----------------|-------------------------------------------------------------------------------------------------------------------------------------------------------------------------------------------------------------------------------------------------------------------------------------------------------------------------------------------------------------------------------------------------------------------------------------------------|
|    | <p>Please select the group that is most appropriate for each provider:</p> <ul style="list-style-type: none"> <li>• Providers who should be first contact clinicians that diagnose, treat, triage, and refer spine patients</li> <li>• Providers who should evaluate spine patients in the present of red flags or if conservative care has not achieved desired outcomes</li> <li>• Providers who should have a supportive rather than a primary role for spine patients</li> </ul> |                | <p>Emergency Physician<br/> Health Coach<br/> Massage Therapist<br/> Neurologist<br/> Neurosurgeon<br/> Nurse Practitioner<br/> Orthopaedic Surgeon<br/> Physiatrist<br/> Physical Therapist<br/> Physician Assistant<br/> Primary Care Physician<br/> Psychiatrist<br/> Psychologist<br/> Radiologists<br/> Registered Nurse<br/> Sports Medicine Physician<br/> Tai Chi Instructor<br/> Weight Management Instructor<br/> Yoga Instructor</p> |
| 26 | <p>Please sort each provider into 1 of the 3 boxes to indicate what is needed for an optimal DUHS spine care workforce:</p> <ul style="list-style-type: none"> <li>• Current workforce is optimal</li> <li>• Workforce requires more of these clinicians</li> <li>• Workforce requires fewer of these clinicians</li> </ul>                                                                                                                                                          | Card sort grid | <p>Primary Care Physician<br/> Physical Therapist<br/> Physician Assistant<br/> Nurse Practitioner<br/> Orthopaedic Surgeon<br/> Neurosurgeon<br/> Physiatrist<br/> Chiropractor</p>                                                                                                                                                                                                                                                            |
